# Supplementary material for: Emergence of an early SARS-CoV-2 epidemic in the United States
Source: bioRxiv or medRxiv preprint supplement (doi:10.1101/2021.02.05.21251235), 2021-02-08

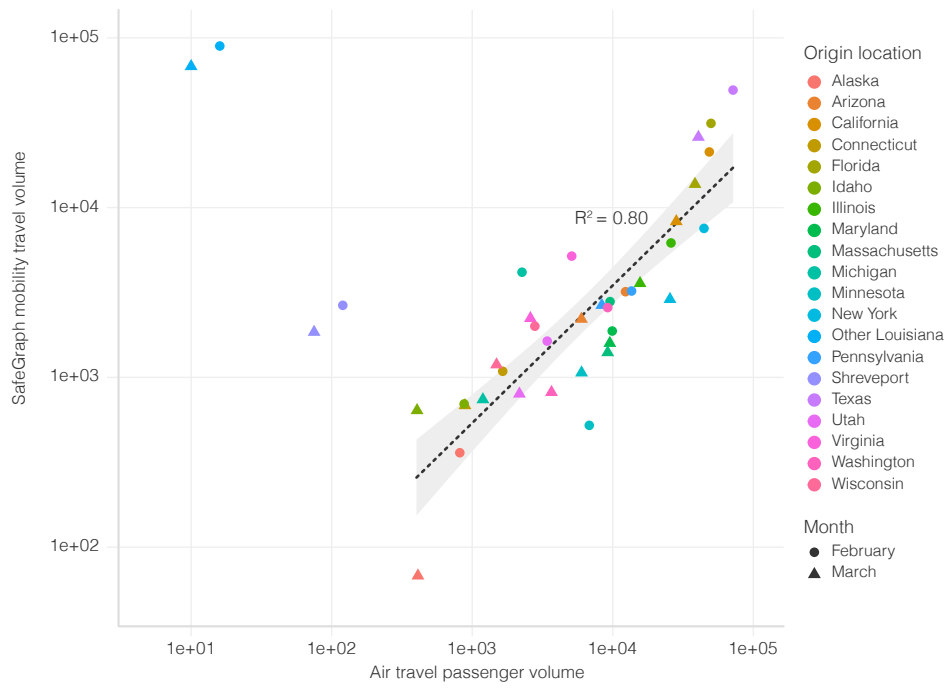

Supplement: Supplementary file [file media-5.pdf]
